# Supplementary material for: The Need for Fission Track Data Transparency
Source: Copernicus journal article supplement (doi:10.5194/gchron-2024-26), 2024-10-09
Supplement: Supplementary file 1 [file gchron-2024-26-supplement.pdf]

## Supplementary file for

### The Need for Fission Track Data Transparency

Murat T. Tamer<sup>1,2\*</sup>, Ling Chung<sup>3</sup>, Richard A. Ketcham<sup>2</sup>, Andrew J. W. Gleadow<sup>3</sup>

<sup>1</sup> State Key Laboratory of Earthquake Dynamics, Institute of Geology, China Earthquake Administration, Beijing 100029, China

<sup>2</sup> Jackson School of Geosciences, The University of Texas at Austin, 78712 Austin, Texas, U.S.A.

<sup>3</sup> School of Geography, Earth and Atmospheric Sciences, University of Melbourne, 3010 Melbourne, Victoria, Australia

Corresponding author: Murat T. Tamer (murat@ies.ac.cn)

This supplementary file contains Table S1, Figure S1 and Table S2.

Table S1: Description of images. UT: University of Texas at Austin, UM: University of Melbourne.

| Grain | Image Source | Description                                                                                                                                                                                       |
|-------|--------------|---------------------------------------------------------------------------------------------------------------------------------------------------------------------------------------------------|
| 1     | UM           | Not parallel to c-axis, not acceptable                                                                                                                                                            |
| 2     | UM           | Fluid in tracks, not acceptable                                                                                                                                                                   |
| 3     | UM           | Not 100% C-parallel and with low number of inclusion but acceptable. If U ppm is determined using LA-ICP-MS approach, need to cross check counting area as track distribution is slightly uneven. |
| 4     | UM           | Acceptable grain                                                                                                                                                                                  |
| 5     | UM           | Acceptable if the parts with inclusions are excluded                                                                                                                                              |
| 6     | UM           | Not parallel to c-axis, not acceptable                                                                                                                                                            |
| 7     | UM           | Acceptable if the parts with inclusions and dislocations (left hand corner) are excluded                                                                                                          |
| 8     | UM           | Too many inclusions, not acceptable                                                                                                                                                               |
| 9     | UM           | Acceptable if the parts with inclusions and cluster of small disturbing surface features are excluded                                                                                             |
| 10    | UM           | Not parallel to c-axis, not acceptable                                                                                                                                                            |
| 11    | UM           | Exclusively for length measurement                                                                                                                                                                |
| 12    | UM           | Exclusively for length measurement                                                                                                                                                                |
| 13    | UM           | Exclusively for length measurement                                                                                                                                                                |
| 14    | UT           | Exclusively for length measurement                                                                                                                                                                |
| 15    | UT           | Exclusively for length measurement                                                                                                                                                                |
| 16    | UM           | Acceptable if the parts with inclusions and dislocations (left hand corner) are excluded.                                                                                                         |
| 17    | UM           | Acceptable if the parts with inclusions are excluded                                                                                                                                              |
| 18    | UM           | Acceptable if the parts with inclusions are excluded                                                                                                                                              |
| 19    | UM           | Acceptable if the parts with inclusions are excluded                                                                                                                                              |
| 20    | UM           | Acceptable grain                                                                                                                                                                                  |
| 21    | UM           | Acceptable grain                                                                                                                                                                                  |
| 22    | UM           | Acceptable grain                                                                                                                                                                                  |

|    |    |                                                                                                                                                                                                                                               |
|----|----|-----------------------------------------------------------------------------------------------------------------------------------------------------------------------------------------------------------------------------------------------|
|    |    | If U ppm is determined using LA-ICP-MS approach, need to cross check counting area as track distribution is slightly uneven.                                                                                                                  |
| 23 | UM | Not parallel to c-axis, not acceptable                                                                                                                                                                                                        |
| 24 | UT | Fluid in tracks and noticeable uneven track distribution, not acceptable                                                                                                                                                                      |
| 25 | UM | Acceptable grain                                                                                                                                                                                                                              |
| 26 | UM | Acceptable grain<br>If U ppm is determined using LA-ICP-MS approach, need to cross check counting area as track distribution is slightly uneven.                                                                                              |
| 27 | UM | Acceptable grain<br>If U ppm is determined using LA-ICP-MS approach, need to cross check counting area as track distribution is slightly uneven.                                                                                              |
| 28 | UM | Acceptable grain<br>If U ppm is determined using LA-ICP-MS approach, need to cross check counting area as track distribution is slightly uneven.                                                                                              |
| 29 | UM | Acceptable grain                                                                                                                                                                                                                              |
| 30 | UM | Acceptable grain if the parts with inclusions and dislocations are excluded.                                                                                                                                                                  |
| 31 | UT | Too many inclusions, not acceptable                                                                                                                                                                                                           |
| 32 | UT | Not 100% C-parallel and noticeably uneven track distribution.<br>If U content is determined using LA-ICP-MS, need to be careful with region of interest selection. I would not count this one if there are other options.<br>Borderline grain |
| 33 | UT | Not parallel to c-axis, obvious uneven track distribution, not acceptable                                                                                                                                                                     |
| 34 | UT | Too many inclusions, not acceptable                                                                                                                                                                                                           |
| 35 | UT | Borderline grain                                                                                                                                                                                                                              |
| 36 | UT | Too many inclusions, not acceptable                                                                                                                                                                                                           |
| 37 | UT | Low track density, be careful with region of interest selection. Acceptable grain                                                                                                                                                             |
| 38 | UT | Too many inclusions, not acceptable                                                                                                                                                                                                           |
| 39 | UT | Not 100% C-parallel but acceptable.<br>Acceptable grain                                                                                                                                                                                       |
| 40 | UT | Too many inclusions, not acceptable                                                                                                                                                                                                           |
| 41 | UT | Acceptable grain                                                                                                                                                                                                                              |
| 42 | UM | 50x2 micron graticule                                                                                                                                                                                                                         |
| 43 | UT | Pyser-SGI Graticule 02A00429 S16 Stage MIC 1mm/0.01mm                                                                                                                                                                                         |
| 44 | UT | Pyser-SGI Graticule 02A00429 S16 Stage MIC 1mm/0.01mm                                                                                                                                                                                         |

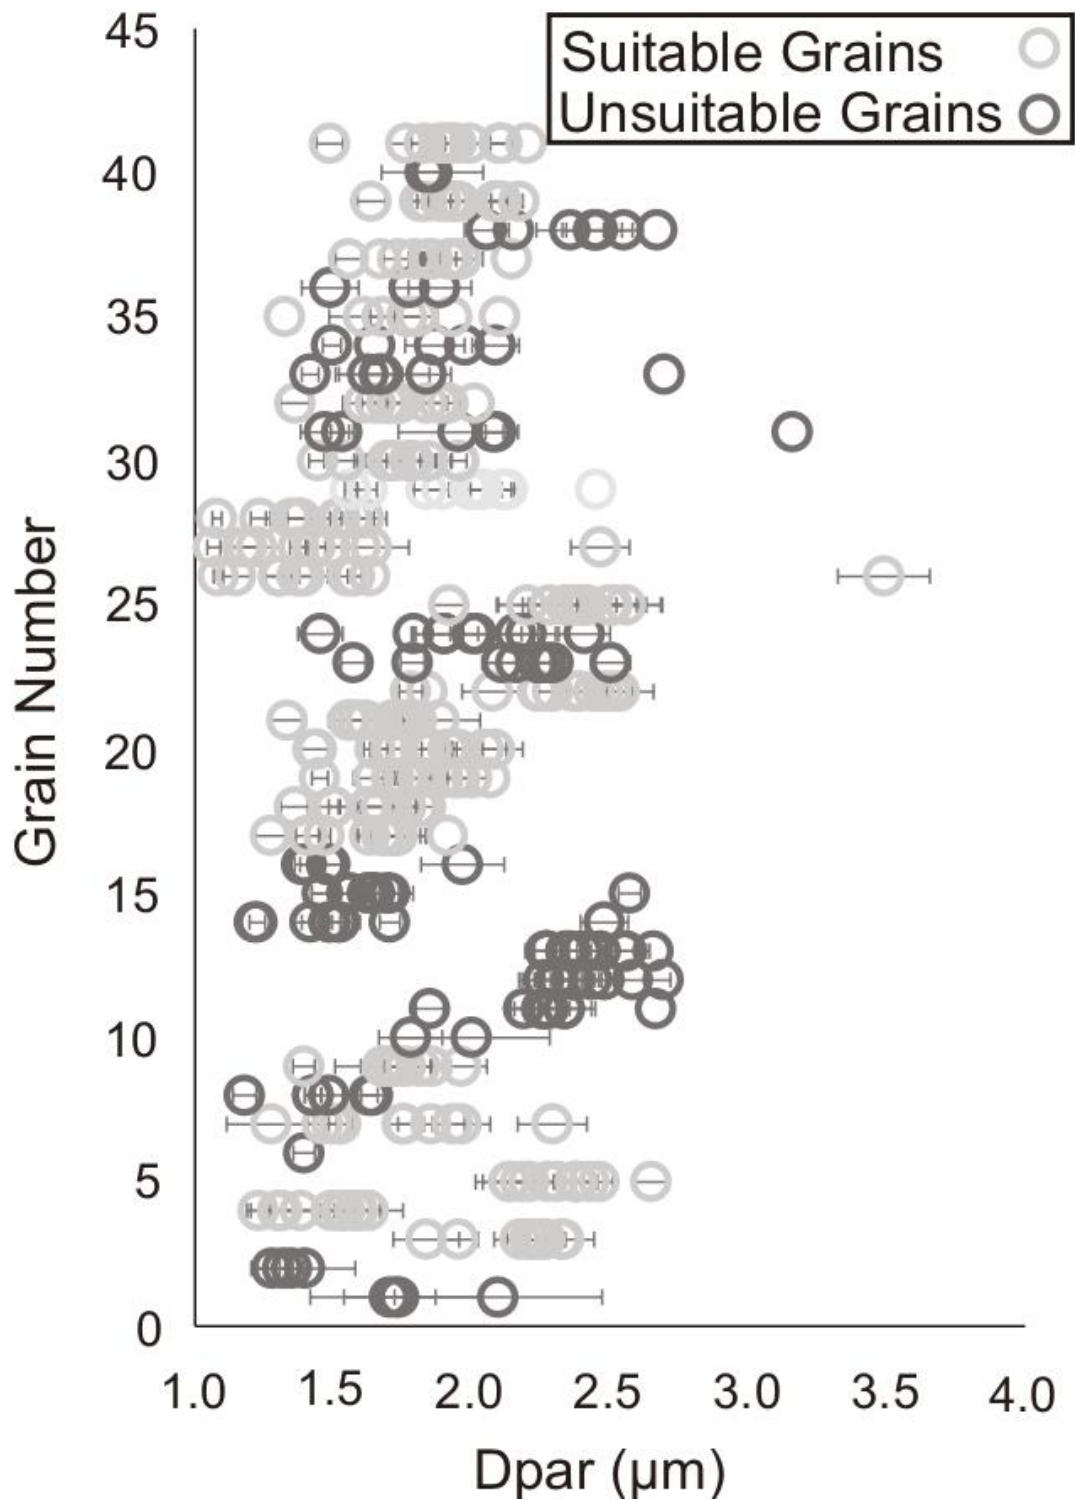

Figure S1: Dpar measurements on suitable (grey) and unsuitable (dark grey) grains. Each circle represents the mean (with an error bar showing one standard deviation, if reported) dpar for that grain. Values for suitable grains tend to cluster, with occasional outliers. Unsuitable grains tended to result in more dispersed results.

Table S2: UT: University of Texas at Austin; ATOMKI: Institute for Nuclear Research, Debrecen, Hungary; UG: University of Göttingen; UO: University of Oklahoma; UM: University of Melbourne; IGG-CNR: Institute of Geosciences and Earth Resources, National Research Council of Italy; APLLC: Apatite.com Partners Limited Liability.

| Analyst | Lab | Name & Affiliation at the time of participation |
|---------|-----|-------------------------------------------------|
| 1       | 1   | Anonymous (UM)                                  |
| 2       | 2   | M. Tamer (UT)                                   |
| 3       | 3   | Anonymous                                       |
| 4       | 4   | Anonymous                                       |
| 5       | 5   | Anonymous                                       |
| 6       | 6/7 | R. Arató (ATOMKI/UG)                            |
| 7       | 8   | G. Jepson (UO)                                  |
| 8       | 9   | Anonymous                                       |
| 9       | 9   | Anonymous                                       |
| 10      | 1   | L. Chung (UM)                                   |
| 11      | 10  | M. Balestrieri (IGG-CNR)                        |
| 12      | 11  | Anonymous                                       |
| 13      | 12  | Anonymous                                       |
| 14      | 13  | Anonymous                                       |
| 15      | 14  | Anonymous                                       |
| 16*     | 15  | R. Donelick (APLLC)                             |
