# Supplementary material for: The Need for Fission Track Data Transparency
Source: Copernicus journal article supplement (doi:10.5194/gchron-2024-26), 2024-10-09
Supplement: Supplementary file [file gchron-2024-26-AC1-supplement.pdf]

## A point-by-point response to the reviewer#1 comments

### General Comments

- The data presented here are very important and need to be published. My strong preference is to “Accept with Major Revisions” this submission. Lacking major revisions such as suggested here, I urge this paper be Rejected by the Editor, re-written by the Authors, and re-submitted for review.
- Major revision required: The document and its arguments are poorly organized and the English wording and grammar needs to be improved significantly.
- Suggestion regarding re-organization:

Lines 11-12: “We report a new image-based inter-analyst study to investigate fission-track grain selection and analysis by 13 participants from an image data set that included grains of variable quality.”

From the perspective of the inter-analyst study, organize the data, results, and recommendations around these 6+ “essential ingredients” or essential steps:

- (1) Select suitable apatite grain for age measurement
- (2) Select region of interest for fission track counting
- (3) Count fission tracks intersecting ROI surface
- (4) Measure confined fission track lengths
- (5) Measure Dpar, Cl, or other kinetic parameter
- (6) Measure uranium concentration

a.EDM – Count induced fission tracks corresponding to ROI surface

b.LAICPMS – Measure representative area of ROI surface

+

(7) Collect, archive, and share digital images to measure and permit re-measurement of fission track data

- I have not reviewed figures, tables, and their captions, pending major revision.
- I have not reviewed supplementary materials, pending major revision.
- I am willing to review a revised manuscript.

*Our Reply: We thank the reviewer for the comments and suggestions. We implemented almost all of the reviewer suggestions and rejected some others, including re-organization. The reviewer documents seven essential ingredients and asks to reorganize the data, results and*

*recommendations around these 6+ essential ingredients. From these 7 points, we focused on #1, #2, #3, #4 and #5 in our investigations and suggested the 7th point as part of our conclusions. We did review a single grain of an analyst in Figure 5 that covers #3 listed in the reviewers list. The results of Dpar measurements (#5) are also documented in the supplementary files. Uranium concentration (6#) was not in the scope of this study. From our perspective the current state of construction of this study clearly covers and explains all these points already. We edited the introduction according to reviewers list.*

*We provide the reasons for those suggestions we rejected to adopt for we hope to promote healthier scientific communication with the reviewer and constructive criticism for the benefit of the readers and our study here. In the abstract, we briefly document the study, its major results, and conclusions. Documenting and arguing about these 7 “essential ingredients” in the abstract would make it unnecessarily longer.*

#### Title

- A new title is suggested: The Need for Apatite Fission Track Data Transparency and Sharing

*Our Reply: We changed the title accordingly.*

#### Abstract

- Emphasize this study concerns apatite fission track data.

*Our Reply: Edited.*

- Define data transparency and how you propose to implement it.

*Our Reply: Edited.*

- Define data sharing and how you propose to implement it.

*Our Reply: Edited.*

- Include list of 6+ “essential ingredients” or essential steps here and argue around them

*Our Reply: The major motivation of this study is to compare grain selection, ROI placement, length measurement validity and overall comparison of Dpar measurements. Listing and arguing on these 6+ essential ingredients do not belong to the abstract in our opinion.*

Lines 16-17: “there is a danger of “squeezing the rock” weakening selection criteria.” “squeezing the rock” presumably comes from “squeezing blood from a rock” (a saying recognized in USA at

least). Please drop this statement. What you mean by “squeezing the rock” is more like “filling a line in a table”.

*Our Reply: Edited.*

Line 18: This statement “Juxtaposing selected regions of interest (ROIs) on the same grains indicates that zoned grains and grains with inclusions and defects yield varying track density estimates, indicating that ROI placement can be an influential factor.” is just one of many statements that can be made here. Either list all of them or drop this one.

*Our Reply: All the factors are listed in the introduction. In this study, we examined the ROI for the first time, so, this statement should be in the abstract.*

## 1 Introduction

- Emphasize this study concerns apatite fission track data.

*Our Reply: Edited.*

Line 35: First mention of “apatite”, yet the data presented here are from only apatite, and several “essential ingredients” are dominated by apatite studies.

*Our Reply: We added apatite in the first sentence of introduction.*

Lines 28-30: I suggest this list of 6+ “essential ingredients”

- (1) Select suitable apatite grain for age measurement
  - (2) Select region of interest for fission track counting
  - (3) Count fission tracks intersecting ROI surface
  - (4) Measure confined fission track lengths
  - (5) Measure  $D_{par}$ ,  $Cl$ , or other kinetic parameter
  - (6) Measure uranium concentration
    - a.EDM – Count induced fission tracks corresponding to ROI surface
    - b.LAICPMS – Measure representative area of ROI surface
- +
- (7) Collect, archive, and share digital images to measure and permit re-measurement of fission track data

*Our Reply: The first ingredient listed by the reviewer is the pre-condition of fission track studies, and the last one is our conclusion. We like to stick to the current list as it is but we edited the text according to reviewer comments.*

Lines 29-30: “(4) average etch pit diameter (Dpar) measurements per grain,” re-word to “(4) mean etch figure diameter parallel to c-axis (Dpar; Donelick, 1993; Burtner et al., 1994; Donelick et al., 1999) for each apatite grain,” I hate being the guy pushing his own papers, but these papers are appropriate, especially given the >10 years Dr. Gleadow denied the value of this parameter (and its sister Dper).

Donelick, R.A., Ketcham, R.A., and Carlson, W.D., 1999, Variability of apatite fission track annealing kinetics II: Crystallographic orientation effects. *American Mineralogist*, v. 84, pp. 1224-1234.

Burtner, R.L., Nigrini, A., and Donelick, R.A., 1994, Thermochronology of Lower Cretaceous source rocks in the Idaho-Wyoming thrust belt. *American Association of Petroleum Geologists Bulletin*, vol. 78, no. 10, pp. 1613-1636.

Donelick, R.A., 1993, A method of fission track analysis utilizing bulk chemical etching of apatite. U.S. Patent Number 5,267,274.

*Our Reply: Edited.*

Lines 31-35: “While laser ablation mass spectrometry has become an alternative (Hasebe et al., 2014) to the widely used external detector method (EDM) (Gleadow and Lovering 1977) for uranium content determination, the first four inputs are still largely analyst-driven, although recent developments in image analysis and AI have contributed significant advances in auto-counting and auto-measurement (Gleadow et al., 2009, 2019; Nachtergaele and De Grave 2021; Li et al., 2022; Ren et al., 2023; Boone et al., 2023).” Break this sentence into 2 or more sentences to make these points.

*Our Reply: Edited.*

Line 36: “significant variation in measurements for the same samples and even standards” More information is needed here. The abstract in Line 1 leads off introducing your new “inter-analyst study” so you need to compare new to old. Help the reader better understand which of the “6+ essential ingredients” might be the source of “significant variation” here or there in previous and the current work.

*Our Reply: We cannot catalogue and compare all of these studies, but we have noted what they lack in relation to the current one, and relate these to the listed ingredients.*

Line 43: “Grains where oily fluids have penetrated” It is not only “oily fluids”, but also aqueous fluids. My experiences is that a paper towel alone cannot be guaranteed to remove distilled water in tracks from washing after etching.

*Our Reply: Edited.*

Lines 46-47: “cause overestimation of ages.” Or underestimation of the presence of defects here and there (say in Durango) may cause the analyst to lean toward “defect” for questionable features.

*Our Reply: Excellent point that we missed. Edited. Thank you!*

Lines 52-53: ”Whereas the area counted for fission-track density determinations has typically been defined by boxes in an eyepiece reticule,...” Replace “typically” with “historically”. “...modern image- based systems allow the user to draw an arbitrarily shaped region of interest.” Replace “modern” with “recent”. What is a reticule? The original sentence is condescending.

*Our Reply: Edited.*

Line 56: “geometry (Donelick et al., 2005)” A better reference would be Fleischer et al. (1975).

Fleischer, R.L., Price, P.B., Walker, R.M., 1975, Nuclear Tracks in Solids: Principles and Techniques. University of California Press, Berkeley, 605 p.

*Our Reply: Edited.*

Lines 64-65: “The suggested number of grains for age measurements for igneous-type samples is typically ~20, or more if there is any indication of kinetic variation (Donelick et al., 2005)” Donelick et al. (2005) did not suggest 20 grains ages, but merely stated that it was common practice. The source of 20 grain ages is Dr. Gleadow, with the choice of 20 grain ages being more concerned with making money (minimal work for Geotrack in the 80s) and less concerned with science (getting a pooled age of desired quality and precision).

*Our Reply: We changed the text to no longer imply that 20 was a suggestion by Donelick (2005). We have not been able to find the source of the number 20, but note that Wagner and van den Haute (1992) state “often a number (n) of 10 grains or more is analyzed in order to have a good statistical sample” (section 3.8.2, p. 85). We also note that the attribution in this comment is inappropriate as well as unsupported.*

Line 66: “squeeze the rock” Drop this saying that may make little sense to some people. Instead, focus on the poor data resulting from poor decisions.

*Our Reply: Edited.*

## 2 Materials and Methods

Line 77: “41 grain and 3 graticule images” What do you mean by grain? What do you mean by graticule images? The word apatite does not appear in this paragraph!

*Our Reply: Edited.*

Line 82: ”grains from UM were etched with 5M HNO<sub>3</sub> at 20°C for 20s (Gleadow et al. 1986).” I am pretty sure Dr. Gleadow has been under-etching c-axis-parallel fission tracks in F-rich apatites since the late 1970s. Please put the correct reference here.

*Our Reply: This comment is, again, unprofessional and off-point. Gleadow and Lovering (1978) indeed used this same protocol, but that study only measured track densities, not lengths. We cite Gleadow et al. (1986) as the one that proposed this protocol for confined length measurements, and added a citation to Green et al (1986), which used step etching to support its appropriateness for generating the first confined-length-annealing data set that served as the foundation of the first thermal-history modeling from apatite fission tracks.*

Line 88: “and in relevant email lists”. I was not included in your list. Who decides who gets invited?

*Our Reply: The announcement of this study was made to public during 17th International Conference of Thermochronology, Santa Fe (Thermo2023), followed by email invitations to the Thermo2023 and geo-tectonics jiscmail email lists. We apologize to anyone we could not reach.*

Lines 88-100: Drop the sales pitch and tell us what this software does, and how the “experiment was made possible” with this software. I can do this study and much more with my own software, so I don’t need Dr. Gleadow to enable me and my research. This reminds of the Iolite bait-and-switch.

*Our Reply: We believe in freedom other than “my way or no way” approach. No participant was preconditioned to use any specific software tool. The second sentence of the previous paragraph in the manuscript and the last part of the study announcement (<https://doi.org/10.1002/essoar.10507907.2>) clearly states that anyone could participate in this study using any software tool. For those who do not have FastTracks but would like to participate using it, we provided a limited license for participation. We hope to see reviewer’s participation with his own software in the future inter-analyst studies. If the reviewer would*

*provide a limited software tool just for participation, we would like to test it in the future studies. In the same paragraph towards to the end of section 2.2 we explain that the .xml files can be used reload the analyses.*

Lines 105-106: “Rather they are simply used as reference values that are probably typical of reasonably experienced analysts.” This paragraph is difficult as you do not want to tell everyone that your judgements are correct and those that deviate from yours are incorrect. Give the reader evidence here, right now, that you are qualified to make this decision. Show a zeta calibration with 100 grains of Durango or something like that! Provide those images too. We should be requiring this routinely, you basically argue this point, and you do not provide the evidence.

*Our Reply: Reviewers of this study rejected each other’s track length measurements by 16% in the previous inter-analyst study (Tamer et al., 2019), which is reduced to ~1% in this study. We believe that the reviewers of this study conducted measurements, failed in some, learned lessons and improved with time. We do not claim that those that deviate from our measurements are incorrect per se, however, if the deviation is significant there must be some reasons behind it. Having a different opinion on suitability of a few grains and maybe some tracks is an expected outcome. In fact, we think that if all the analysts of ~50 fission track labs would participate in a larger scale global study, there will be no 100% consensus on all the aspects of fission track analysis. In this study, we rather point out the deviations where we see them the most. To tackle these, we are preparing fission track analysis guidelines and teaching modules as future studies for the fission track community.*

Lines 113-114: “was considered unsuitable” By whom? I assume the answer is “L. Chung and... M. Tamer” from Lines 103-104.

*Our Reply: Edited.*

Line 119: “borderline-quality grains” Borderline is not defined here. Suitable is not defined here. This whole paragraph needs to be flipped, tell us what makes a grain suitable, what is compromised for borderline, and then finish with what makes a grain absolutely unsuitable.

*Our Reply: By defining the unsuitable, we define the suitable. We like to stick to this construction and added additional explanation for borderline-quality grains.*

Line 154: “Graticule images” Really? Images of the graticule in the eyepiece? Perhaps you mean images of a NIST-traceable length calibration grid on a microscope slide?

*Our Reply: In section 2.1 we defined graticule as length calibration grid on a microscope slide according to one of the previous comments of the reviewer.*

Line 155: “only five participants reported measuring them.” Well, did they get similar results to the default graticule calibration? More info please.

*Our Reply: Edited.*

Lines 161-162: “varying region of interest selection, light source preference, and track counting routines” You discuss varying region of interest selection. What do you mean by light source preference and do you have data to back this up? Same question for track counting routines, after telling us what you mean by track counting routines.

*Our Reply: The analyses on these grains show different ROI placements. During the follow-up some of the participants mentioned that they use transmitted light or reflected light only. Combination of these two pieces of information led us to mention track counting routines.*

Lines 180-181: “This high rate of acknowledgment by the participants supports the soundness of the criteria utilized by the reviewers.” Maybe. Who cares. What matters is that there is room to educate each other in this field and to, perhaps, lower variation among labs by abiding by the principles of data transparency and data sharing.

*Our Reply: Thank you for the statement. This high rate of acknowledgment rather suggests that there is a need of guidelines and teaching modules. Lowering the variation among the labs will be the ultimate goal in some of our future studies, where we hope to see reviewer’s participation in the future inter-analyst studies.*

Lines 185-186: “Some of the participants used FastTracks’ automatic tools for c-axis orientation and dpar length measurements.” This is important information out of nowhere. You need to separate out the effects of these measurements from those who did not use these tools. Also, you should show how well FastTracks reproduced measurements from analyst to analyst that used these capabilities. The ultimate goal is to lower variance among analysts. Did FastTracks succeed or fail here?

*Our Reply: We did not make this comparison because during the follow-ups we failed to ask the participants if they corrected auto-measurements. This was poor follow-up discussion planning on our part.*

Lines 196-197: “Participants 1 and 10 and Participants 8 and 9 are from the same two laboratories and show similarities in their respective track density results.” Give numbers here and elsewhere in this discussion that back up your statements. Don’t make me search for this information in the tables and figures.



*Our Reply: In Figure 3 we provide density histograms from all the participants, ranging from 0 to  $2.0 \cdot 10^6$  track/cm<sup>2</sup>). We suggest the reviewer to follow up with the figure, since providing a single mean or median density value may be misleading.*

Lines 216-228: The discussion does not give any numbers telling the reader what is meant by “reliable and consistent”, “skewed... to lower values”, “varying number of measurements”, “show similarities”, “divergent results”. Please use the results to make your case. These generalized statements teach me nothing.

*Our Reply: We provided two additional tables and implemented some of the general/more important values in the text.*

Line 236: “Donelick et al., 2005” A better reference is Fleischer et al., 1975.

*Our Reply: Edited.*

Lines 256-257: “However, counting tracks solely in transmitted-light images can cause an underestimation of the track density (Aslanian et al., 2022; Tamer and Ketcham 2023).” The word “can” does not mean “does”. And I don’t need Dr. Ketcham telling me how to count. What matters more is that analysts apply the same methods/criteria/data types to unknowns as they do standards. The argument can be made that data from this whole paper need to be divided by data from the next-inter- analyst study of appropriate age and length calibration standards.

*Our Reply: We do not presume to be telling Dr. Donelick how to count, we are merely conveying the findings of these two, independent, studies.*

Line 268: “grains etched with the 5.0 M HNO<sub>3</sub> 20s 20 C (Gleadow et al. 1986) protocol appear to be under-etched” Because they are. They have been since 1977 or so. They continue to be.

*Our Reply: Again, the comment is inappropriate. Our view based on other work is that all etching protocols produce under-etched tracks, because confined track revelation is a continuous process, with new tracks being intersected by expanding etchant pathways at all times. The relevant questions are what proportion of visible tracks are sufficiently etched, and how consistent are analyst choices. But, that’s not an argument for this paper.*

Lines 27-271: “Analysts may consider unsuitable grains and/or conduct invalid confined track length measurements depending on their years of experience, training, and the difficulty in finding sufficient grains to meet analytical goals.” This sentence needs to be re-written so that the several points being made are clear to the reader.

*Our Reply: We have edited this text.*

Line 271: ““Squeezing the rock”,” Drop this saying.

*Our Reply: Edited.*

Line 274: “Results of graticule and confined track length calibrations and the identity of the analyst should be stated in publications.” In this paper, you offer graticule calibrations somewhere. You do not offer any confined length calibration data. You don’t even mention, much less offer, any age calibration data such a zeta calibration standard. I would like to see data here divided by the appropriate calibration data.

*Our Reply: This is another poor planning on our side, we should have asked about the confined track length standard calibration results from the participants at the beginning. Graticule, confined track length calibrations and the identity of the analyst are not requested by the journals and editors but we hope that with this study, journal editors will slowly require this info along with images and analyses. We agree with the comment however, zeta calibration was beyond the scope of this study. This will be surely part of the next inter-analyst study.*

Line 280-281: “precise matching of spontaneous and induced track areas in the EDM can also be difficult in some cases.” I would love to sort through the decades of mica detectors affixed to under-etched AFT grain mounts at UMelbourne and elsewhere and reveal the staggering percentage of EDM images that are poor due to poor contact – but counted anyway to produce a line in a data table.

*Our Reply: This is another comment that is neither appropriate nor germane.*

Lines 306-307: “Although fission-track data have generally fared well in inter-laboratory age comparisons in recent years” My assessment is just the opposite. The variance among laboratories is increasing, not decreasing, since the 1980s. This is almost certainly due to inconsistent – perhaps even poor at times – training of analysts, at the start and as the years go by. This is made easier by flashy hardware and software products that give the appearance of expertise but do not substitute for it.

*Our Reply: We disagree. According to our own analysis the reproducibility observed in the data submitted for Ketcham et al. (2018) compares favorably with that among participants reported by Miller et al. (1985, 1990, 1993). We are unsure of which aspects of the data the reviewer is focusing on, or what statistics he is using, to arrive at his conclusion.*

Line 316: “encouraging data transparency” Re-write to “encouraging data transparency and sharing”.

*Our Reply: Edited.*
